# Supplementary material for: DLEU2 facilitates bladder cancer progression through miR-103a-2-5p/SOS1 axis
Source: PeerJ. 2025 Apr 8;13:e18995. doi: 10.7717/peerj.18995 (PMC11988102; doi:10.7717/peerj.18995)
Supplement: Supplemental Information 2 [file peerj-13-18995-s002.xls]

## Sheet: Sheet1
ITEM TO CHECK	IMPORTANCE	CHECKLIST
EXPERIMENTAL DESIGN
Definition of experimental and control groups	E	line 90-94
Number within each group	E	line 96
Assay carried out by core lab or investigator's lab?	D	line 96
Acknowledgement of authors' contributions	D	Not applicable
SAMPLE
Description	E	Not applicable
Volume/mass of sample processed	D	Not applicable
Microdissection or macrodissection	E	Not applicable
Processing procedure	E	Not applicable
If frozen - how and how quickly?	E	Not applicable
If fixed - with what, how quickly?	E	Not applicable
Sample storage conditions and duration (especially for FFPE samples)	E	Not applicable
NUCLEIC ACID EXTRACTION
Procedure and/or instrumentation	E	line 99
Name of kit and details of any modifications	E	line 99
Source of additional reagents used	D	line 99
Details of DNase or RNAse treatment	E	line 99
Contamination assessment (DNA or RNA)	E	line 100-103
Nucleic acid quantification	E	line 100-103
Instrument and method	E	line 100-103
Purity (A260/A280)	D	line 100-103
Yield	D	Not applicable
RNA integrity method/instrument	E	line 100-103
RIN/RQI or Cq of 3' and 5' transcripts	E	line 100-103
Electrophoresis traces	D	line 100-103
Inhibition testing (Cq dilutions, spike or other)	E	line 100-103
REVERSE TRANSCRIPTION
Complete reaction conditions	E	line 103-107
Amount of RNA and reaction volume	E	line 103-107
Priming oligonucleotide (if using GSP) and concentration	E	line 103-107
Reverse transcriptase and concentration	E	line 103-107
Temperature and time	E	line 103-107
Manufacturer of reagents and catalogue numbers	D	line 103-107
Cqs with and without RT	D*	Not applicable
Storage conditions of cDNA	D	line 103-107
qPCR TARGET INFORMATION
If multiplex, efficiency and LOD of each assay.	E	Not applicable
Sequence accession number	E	line 109-110
Location of amplicon	D	Not applicable
Amplicon length	E	Table 1
In silico specificity screen (BLAST, etc)	E	line 111
Pseudogenes, retropseudogenes or other homologs?	D	Not applicable
Sequence alignment	D	Not applicable
Secondary structure analysis of amplicon	D	Not applicable
Location of each primer by exon or intron (if applicable)	E	Not applicable
What splice variants are targeted?	E	Not applicable
qPCR OLIGONUCLEOTIDES
Primer sequences	E	Table 1
RTPrimerDB Identification Number	D	None
Probe sequences	D**	None
Location and identity of any modifications	E	None
Manufacturer of oligonucleotides	D	None
Purification method	D	None
qPCR PROTOCOL
Complete reaction conditions	E	line 107-112
Reaction volume and amount of cDNA/DNA	E	line 107-112
Primer, (probe), Mg++ and dNTP concentrations	E	line 107-112
Polymerase identity and concentration	E	line 107-112
Buffer/kit identity and manufacturer	E	line 107-112
Exact chemical constitution of the buffer	D	line 107-112
Additives (SYBR Green I, DMSO, etc.)	E	line 107-112
Manufacturer of plates/tubes and catalog number	D	line 107-112
Complete thermocycling parameters	E	line 107-112
Reaction setup (manual/robotic)	D	line 107-112
Manufacturer of qPCR instrument	E	line 107-112
qPCR VALIDATION
Evidence of optimisation (from gradients)	D	line 107-112
Specificity (gel, sequence, melt, or digest)	E	line 107-112
For SYBR Green I, Cq of the NTC	E	None
Standard curves with slope and y-intercept	E	line 107-112
PCR efficiency calculated from slope	E	line 107-112
Confidence interval for PCR efficiency or standard error	D	None
r2 of standard curve	E	line 107-112
Linear dynamic range	E	None
Cq variation at lower limit	E	None
Confidence intervals throughout range	D	None
Evidence for limit of detection	E	None
If multiplex, efficiency and LOD of each assay.	E	None
DATA ANALYSIS
qPCR analysis program (source, version)	E	line 107-112
Cq method determination	E	line 107-112
Outlier identification and disposition	E	None
Results of NTCs	E	None
Justification of number and choice of reference genes	E	None
Description of normalisation method	E	line 107-112
Number and concordance of biological replicates	D	line 107-112
Number and stage (RT or qPCR) of technical replicates	E	line 107-112
Repeatability (intra-assay variation)	E	None
Reproducibility (inter-assay variation, %CV)	D	None
Power analysis	D	None
Statistical methods for result significance	E	line 107-112
Software (source, version)	E	line 107-112
Cq or raw data submission using RDML	D	None
Table 1. MIQE checklist for authors, reviewers and editors. All essential information (E) must be submitted with the manuscript. Desirable
information (D) should be submitted if available. If using primers obtained from RTPrimerDB, information on qPCR target, oligonucleotides,
protocols and validation is available from that source.
*: Assessing the absence of DNA using a no RT assay is essential when first extracting RNA. Once the sample has been validated as
RDNA-free, inclusion of a no-RT control is desirable, but no longer essential.
**: Disclosure of the probe sequence is highly desirable and strongly encouraged. However, since not all commercial pre-designed assay
vendors provide this information, it cannot be an essential requirement. Use of such assays is advised against.
